# Supplementary material
Source: publisher figshare collection journal article supplement (https://frontiersin.figshare.com/ndownloader/files/28034772)
Supplement: Supplementary file [file 28034772]

**Supplementary file S1.** The distribution of internal transcribed spacer 1 (ITS1) of nuclear ribosomal DNA in the genome of *Hordeum vulgare*.

The distribution of ITS1 copies on *H. vulgare* chromosomes was analysed using a combination of BLAST search and sequence mapping. First, we using BLAST identified the positions of ITS1 within *H. vulgare* chromosomes. We used the V2 assembly of *H. vulgare* genome (Monat et al. 2019), from which a BLAST database was built using Geneious 10.2.6. The ITS1 sequence of *H. vulgare* subsp. *spontaneum* (accession F2097; genbank accession number KU513496) was used as the query and BLASTed against the *H. vulgare* genome using Geneious. The retrieved hits were tabulated and sorted according to their position in particular chromosomes. Next, *H. vulgare* chromosomes [including the unanchored sequences (chrUn)] were annotated in Geneious (with 80% similarity) using the sequences of 18S, 26S, 5.8S, and ITS1 and ITS2 (for the genes, we used the sequences of *H. bogdanii*; see main text for details on the rDNA reference) to determine the integrity of the rDNA around the ITS1 regions obtained from the BLAST search. We distinguished between ITS1 located within repeated arrays composed of complete rDNA units, and those located outside these arrays (Table). In general, both the high copy number and repeat size of rDNA pose a serious obstacle in estimating the copy number of rDNA even in high quality genomic assemblies (Nelson et al. 2019). Therefore, the results presented here should not be interpreted as an estimate of the copy number of rDNA units in *H. vulgare*. Instead, the dataset is to illustrate the existence of scattered copies of ITS1 located outside the main rDNA arrays (Figure).

**Table.** The distribution of ITS1 on *H. vulgare* chromosomes. The ITS1 regions located outside the arrays of complete rDNA units are highlighted in yellow.

| Chromosome | Pairwise identity (%) | Hit end   | Hit start | Query coverage (%) | located within incomplete units outside arrays |
|------------|-----------------------|-----------|-----------|--------------------|------------------------------------------------|
| chr1H      | 99.1                  | 118033793 | 118033906 | 52.53              | yes                                            |
| chr1H      | 97.7                  | 130717592 | 130717808 | 100.00             | no                                             |
| chr1H      | 97.2                  | 130741159 | 130741375 | 100.00             | no                                             |
| chr1H      | 96.8                  | 130755471 | 130755687 | 100.00             | no                                             |
| chr1H      | 98.2                  | 130766271 | 130766486 | 100.00             | no                                             |
| chr1H      | 98.2                  | 130779210 | 130779426 | 100.00             | no                                             |
| chr1H      | 97.7                  | 130790869 | 130791085 | 100.00             | no                                             |
| chr1H      | 99.1                  | 130791705 | 130791812 | 49.77              | no                                             |
| chr1H      | 98.2                  | 130802686 | 130802902 | 100.00             | no                                             |
| chr1H      | 97.2                  | 130816986 | 130817202 | 100.00             | no                                             |
| chr1H      | 98.6                  | 130828393 | 130828609 | 100.00             | no                                             |
| chr1H      | 98.6                  | 130840299 | 130840515 | 100.00             | no                                             |
| chr1H      | 96.0                  | 130853737 | 130853786 | 23.04              | no                                             |
| chr1H      | 97.1                  | 130853783 | 130853885 | 47.47              | no                                             |
| chr1H      | 96.8                  | 130868719 | 130868935 | 100.00             | no                                             |
| chr1H      | 96.3                  | 130882215 | 130882431 | 100.00             | no                                             |
| chr1H      | 98.2                  | 130893786 | 130894002 | 100.00             | no                                             |
| chr1H      | 96.8                  | 130918979 | 130919195 | 100.00             | no                                             |
| chr1H      | 97.2                  | 130929854 | 130930070 | 100.00             | no                                             |
| chr1H      | 97.7                  | 130943355 | 130943571 | 100.00             | no                                             |
| chr1H      | 97.7                  | 130953888 | 130954104 | 100.00             | no                                             |
| chr1H      | 95.9                  | 130965504 | 130965720 | 100.00             | no                                             |
| chr1H      | 98.2                  | 130981236 | 130981452 | 100.00             | no                                             |
| chr1H      | 98.2                  | 130993138 | 130993354 | 100.00             | no                                             |
| chr1H      | 98.7                  | 131006625 | 131006781 | 72.35              | no                                             |
| chr1H      | 98.6                  | 131006987 | 131007203 | 100.00             | no                                             |
| chr1H      | 96.0                  | 131019097 | 131019146 | 23.04              | no                                             |
| chr1H      | 97.1                  | 131019143 | 131019245 | 47.47              | no                                             |
| chr1H      | 96.8                  | 131032943 | 131033159 | 100.00             | no                                             |
| chr1H      | 96.8                  | 131047175 | 131047391 | 100.00             | no                                             |
| chr1H      | 97.0                  | 131047600 | 131047665 | 30.41              | no                                             |
| chr1H      | 97.7                  | 131060536 | 131060752 | 100.00             | no                                             |
| chr1H      | 97.2                  | 131078244 | 131078458 | 99.08              | no                                             |
| chr1H      | 98.2                  | 131092032 | 131092248 | 100.00             | no                                             |
| chr1H      | 97.2                  | 131105356 | 131105572 | 100.00             | no                                             |
| chr1H      | 96.8                  | 131116664 | 131116880 | 100.00             | no                                             |
| chr1H      | 98.6                  | 131130317 | 131130533 | 100.00             | no                                             |
| chr1H      | 98.1                  | 131143452 | 131143666 | 99.08              | no                                             |
| chr1H      | 98.6                  | 131156571 | 131156787 | 100.00             | no                                             |
| chr1H      | 96.8                  | 131168318 | 131168533 | 100.00             | no                                             |
| chr1H      | 98.6                  | 131179320 | 131179536 | 100.00             | no                                             |
| chr1H      | 97.7                  | 131192299 | 131192515 | 100.00             | no                                             |
| chr1H      | 98.1                  | 131202474 | 131202689 | 99.54              | no                                             |
| chr1H      | 97.7                  | 131213129 | 131213345 | 100.00             | no                                             |
| chr1H      | 95.4                  | 131230249 | 131230033 | 100.00             | no                                             |

|       |       |           |           |        |     |
|-------|-------|-----------|-----------|--------|-----|
| chr1H | 97.7  | 131241817 | 131242033 | 100.00 | no  |
| chr1H | 98.1  | 131253918 | 131254133 | 99.54  | no  |
| chr1H | 98.2  | 131266727 | 131266943 | 100.00 | no  |
| chr1H | 97.2  | 131279051 | 131279267 | 100.00 | no  |
| chr1H | 92.2  | 131322894 | 131323110 | 100.00 | yes |
| chr1H | 91.7  | 131399299 | 131399515 | 100.00 | yes |
| chr1H | 89.9  | 131427311 | 131427527 | 100.00 | yes |
| chr1H | 84.8  | 131464574 | 131464774 | 100.00 | yes |
| chr1H | 89.8  | 131512122 | 131512336 | 99.08  | yes |
| chr1H | 97.2  | 184756238 | 184756344 | 49.31  | yes |
| chr2H | 94.9  | 160175713 | 160175497 | 100.00 | yes |
| chr2H | 95.4  | 160214061 | 160213845 | 100.00 | yes |
| chr2H | 96.3  | 160214648 | 160214432 | 100.00 | yes |
| chr2H | 95.9  | 160238992 | 160238776 | 100.00 | yes |
| chr2H | 97.7  | 160253210 | 160252994 | 100.00 | yes |
| chr2H | 95.4  | 160265828 | 160265612 | 100.00 | yes |
| chr2H | 94.5  | 160290612 | 160290396 | 100.00 | yes |
| chr4H | 90.5  | 142551610 | 142551537 | 34.10  | yes |
| chr4H | 95.9  | 142569407 | 142569623 | 100.00 | yes |
| chr4H | 97.8  | 142581512 | 142581649 | 64.06  | yes |
| chr4H | 95.8  | 242301746 | 242301652 | 43.78  | yes |
| chr5H | 97.7  | 53056365  | 53056581  | 100.00 | yes |
| chr5H | 98.2  | 53079158  | 53079374  | 100.00 | yes |
| chr5H | 97.2  | 53091433  | 53091649  | 100.00 | yes |
| chr5H | 88.0  | 53105341  | 53105536  | 100.00 | no  |
| chr5H | 98.2  | 53119146  | 53119362  | 100.00 | no  |
| chr5H | 96.8  | 53130534  | 53130749  | 99.54  | no  |
| chr5H | 94.5  | 53142845  | 53143058  | 100.00 | no  |
| chr5H | 98.1  | 53153566  | 53153617  | 23.96  | no  |
| chr5H | 97.2  | 53153897  | 53154113  | 100.00 | no  |
| chr5H | 97.7  | 53161466  | 53161682  | 100.00 | no  |
| chr5H | 96.8  | 53176106  | 53176322  | 100.00 | no  |
| chr5H | 98.1  | 53189070  | 53189284  | 99.08  | no  |
| chr5H | 98.2  | 53201529  | 53201745  | 100.00 | no  |
| chr5H | 96.8  | 53210586  | 53210802  | 100.00 | no  |
| chr5H | 96.8  | 53252110  | 53252326  | 100.00 | no  |
| chr5H | 97.2  | 53267870  | 53268086  | 100.00 | no  |
| chr5H | 96.8  | 53281184  | 53281400  | 100.00 | no  |
| chr5H | 95.9  | 53293391  | 53293607  | 100.00 | no  |
| chr5H | 95.4  | 53306561  | 53306776  | 99.54  | no  |
| chr5H | 97.7  | 53320048  | 53320262  | 99.08  | no  |
| chr5H | 97.7  | 53322759  | 53322975  | 100.00 | no  |
| chr5H | 96.3  | 53335543  | 53335759  | 100.00 | no  |
| chr5H | 96.8  | 53363687  | 53363903  | 100.00 | no  |
| chr5H | 94.0  | 53414063  | 53414277  | 99.08  | no  |
| chr5H | 94.9  | 53432443  | 53432658  | 100.00 | yes |
| chr5H | 88.9  | 123171296 | 123171080 | 100.00 | yes |
| chr5H | 91.1  | 476032091 | 476032134 | 20.74  | yes |
| chr5H | 89.5  | 476042135 | 476042220 | 39.63  | yes |
| chr6H | 100.0 | 82852352  | 82852568  | 100.00 | yes |
| chr6H | 99.5  | 82838656  | 82838872  | 100.00 | yes |
| chr6H | 98.5  | 89373151  | 89373217  | 30.88  | yes |

|       |       |           |           |        |     |
|-------|-------|-----------|-----------|--------|-----|
| chr7H | 89.5  | 13931162  | 13931030  | 60.83  | yes |
| chr7H | 96.3  | 192583343 | 192583558 | 100.00 | yes |
| chr7H | 96.3  | 192592889 | 192593105 | 100.00 | yes |
| chr7H | 97.2  | 192604438 | 192604654 | 100.00 | yes |
| chr7H | 100.0 | 192619066 | 192619110 | 20.74  | yes |
| chr7H | 96.3  | 192619619 | 192619835 | 100.00 | yes |
| chr7H | 96.8  | 192635110 | 192635326 | 100.00 | yes |
| chrUn | 96.3  | 30824651  | 30824866  | 100.00 | yes |
| chrUn | 93.5  | 30837604  | 30837819  | 100.00 | yes |
| chrUn | 100.0 | 36758578  | 36758653  | 35.02  | yes |
| chrUn | 100.0 | 36758767  | 36758857  | 41.94  | yes |
| chrUn | 99.1  | 38023786  | 38023570  | 100.00 | yes |
| chrUn | 99.5  | 38353245  | 38353461  | 100.00 | yes |
| chrUn | 100.0 | 38529032  | 38528816  | 100.00 | yes |
| chrUn | 99.1  | 39031433  | 39031217  | 100.00 | yes |
| chrUn | 100.0 | 39677024  | 39677236  | 98.16  | yes |
| chrUn | 100.0 | 41003505  | 41003603  | 45.62  | yes |
| chrUn | 100.0 | 43035689  | 43035555  | 62.21  | yes |
| chrUn | 99.1  | 45211201  | 45210985  | 100.00 | yes |
| chrUn | 100.0 | 45717289  | 45717073  | 100.00 | yes |
| chrUn | 100.0 | 45717507  | 45717338  | 78.34  | yes |
| chrUn | 98.6  | 49431497  | 49431281  | 100.00 | yes |
| chrUn | 97.7  | 53763542  | 53763326  | 100.00 | yes |
| chrUn | 100.0 | 56154155  | 56154217  | 29.03  | yes |
| chrUn | 100.0 | 56154326  | 56154482  | 72.35  | yes |
| chrUn | 100.0 | 57271033  | 57270940  | 43.32  | yes |
| chrUn | 99.1  | 60794108  | 60794324  | 100.00 | yes |
| chrUn | 99.1  | 60867655  | 60867439  | 100.00 | yes |
| chrUn | 97.2  | 62239316  | 62239532  | 100.00 | yes |
| chrUn | 98.7  | 64590143  | 64590218  | 35.02  | yes |
| chrUn | 99.1  | 64590227  | 64590443  | 100.00 | yes |
| chrUn | 100.0 | 65238528  | 65238610  | 38.25  | yes |
| chrUn | 100.0 | 67807621  | 67807664  | 20.28  | yes |
| chrUn | 97.8  | 67807751  | 67807933  | 84.33  | yes |
| chrUn | 100.0 | 67935327  | 67935373  | 21.66  | yes |
| chrUn | 100.0 | 67935463  | 67935630  | 77.42  | yes |
| chrUn | 99.5  | 67978602  | 67978818  | 100.00 | yes |
| chrUn | 99.1  | 68213295  | 68213511  | 100.00 | yes |
| chrUn | 100.0 | 68388221  | 68388409  | 87.10  | yes |
| chrUn | 99.4  | 69060395  | 69060554  | 73.73  | yes |
| chrUn | 99.5  | 71431207  | 71430991  | 100.00 | yes |
| chrUn | 100.0 | 71443700  | 71443802  | 47.47  | yes |
| chrUn | 99.1  | 72098503  | 72098287  | 100.00 | yes |
| chrUn | 100.0 | 72713941  | 72714007  | 30.88  | yes |
| chrUn | 100.0 | 72714049  | 72714236  | 86.64  | yes |
| chrUn | 99.5  | 72756180  | 72755964  | 100.00 | yes |
| chrUn | 100.0 | 73000513  | 73000729  | 100.00 | yes |
| chrUn | 100.0 | 73000792  | 73000915  | 57.14  | yes |
| chrUn | 99.5  | 73143261  | 73143045  | 100.00 | yes |
| chrUn | 100.0 | 73163240  | 73163038  | 93.55  | yes |
| chrUn | 99.5  | 74180564  | 74180348  | 100.00 | yes |
| chrUn | 99.2  | 74303371  | 74303498  | 58.99  | yes |

|       |       |          |          |        |     |
|-------|-------|----------|----------|--------|-----|
| chrUn | 99.1  | 74303504 | 74303719 | 99.54  | yes |
| chrUn | 100.0 | 74439128 | 74438912 | 100.00 | yes |
| chrUn | 94.8  | 74829201 | 74829316 | 53.46  | yes |
| chrUn | 95.8  | 74829319 | 74829485 | 76.96  | yes |
| chrUn | 100.0 | 75041631 | 75041447 | 85.25  | yes |
| chrUn | 99.5  | 75158524 | 75158308 | 100.00 | yes |
| chrUn | 100.0 | 75339679 | 75339741 | 29.03  | yes |
| chrUn | 99.5  | 75968228 | 75968444 | 100.00 | yes |
| chrUn | 100.0 | 76060762 | 76060578 | 85.25  | yes |
| chrUn | 99.1  | 76187899 | 76187683 | 100.00 | yes |
| chrUn | 100.0 | 76190400 | 76190309 | 42.40  | yes |
| chrUn | 99.5  | 76319376 | 76319592 | 100.00 | yes |
| chrUn | 100.0 | 76411199 | 76411037 | 75.12  | yes |
| chrUn | 100.0 | 76458032 | 76458137 | 48.85  | yes |
| chrUn | 100.0 | 76458158 | 76458366 | 96.31  | yes |
| chrUn | 100.0 | 76654002 | 76653890 | 52.07  | yes |
| chrUn | 100.0 | 76663802 | 76663676 | 58.53  | yes |
| chrUn | 100.0 | 76989106 | 76988961 | 67.28  | yes |
| chrUn | 99.5  | 77048496 | 77048712 | 100.00 | yes |
| chrUn | 100.0 | 77411617 | 77411512 | 48.85  | yes |
| chrUn | 99.5  | 77565240 | 77565024 | 100.00 | yes |
| chrUn | 100.0 | 78229509 | 78229425 | 39.17  | yes |
| chrUn | 100.0 | 79364600 | 79364492 | 50.23  | yes |
| chrUn | 99.5  | 80396979 | 80396765 | 99.08  | yes |
| chrUn | 99.5  | 80688095 | 80688311 | 100.00 | yes |
| chrUn | 99.1  | 80963145 | 80963030 | 53.46  | yes |
| chrUn | 100.0 | 81894023 | 81894109 | 40.09  | yes |
| chrUn | 99.5  | 83153075 | 83153291 | 100.00 | yes |
| chrUn | 100.0 | 84025368 | 84025152 | 100.00 | yes |

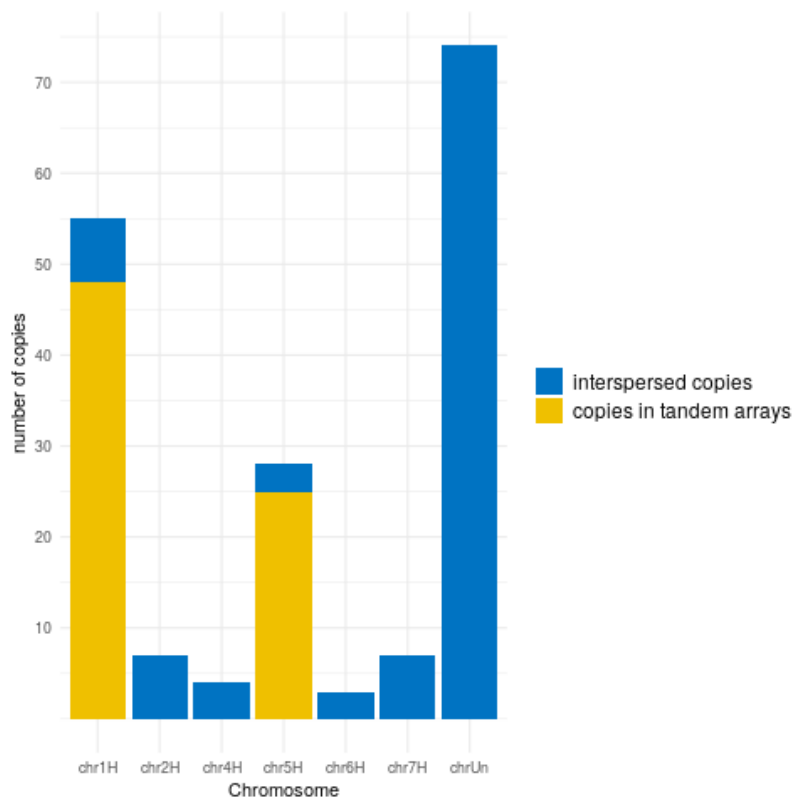

**Figure.** The distribution of ITS1 on *H. vulgare* chromosomes.

## References

Monat, C., Padmarasu, S., Lux, T., Wicker, T., Gundlach, H., Himmelbach, A. et al. (2019). TRITEX: Chromosome-scale sequence assembly of Triticeae genomes with open-source tools. *Genome Biology*. 20: 284. doi:10.1186/s13059-019-1899-5.

Nelson et al. (2019). Mechanisms of rDNA copy number maintenance. *Trends in Genetics*. 35: 734–742.
